# Supplementary material for: Intestinal mRNA expression profiles associated with mucosal healing in ustekinumab-treated Crohn's disease patients: bioinformatics analysis and prospective cohort validation
Source: Springer Nature journal article supplement (doi:10.1186/s12967-024-05427-w), 2024-06-26
Supplement: 12967_2024_5427_MOESM2_ESM.pdf [file 12967_2024_5427_MOESM2_ESM.pdf]

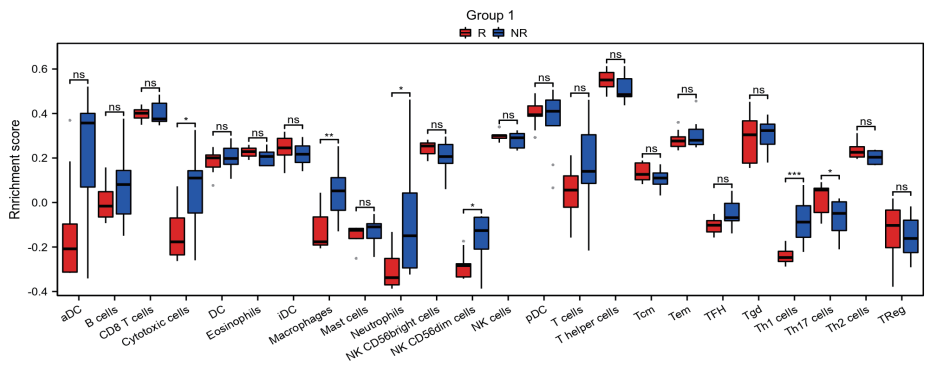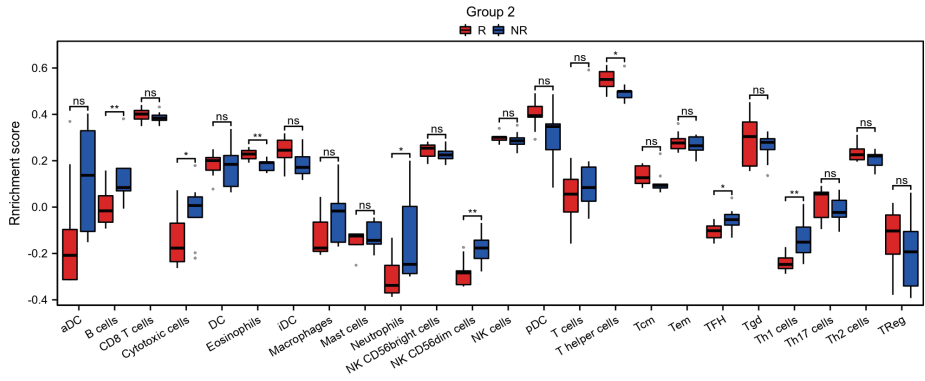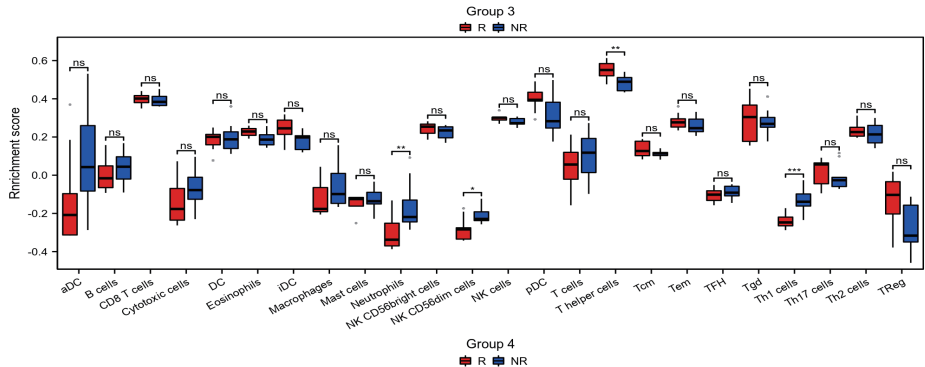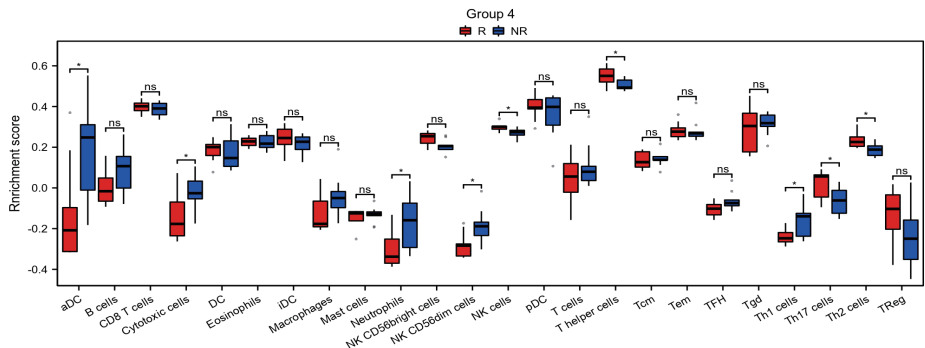

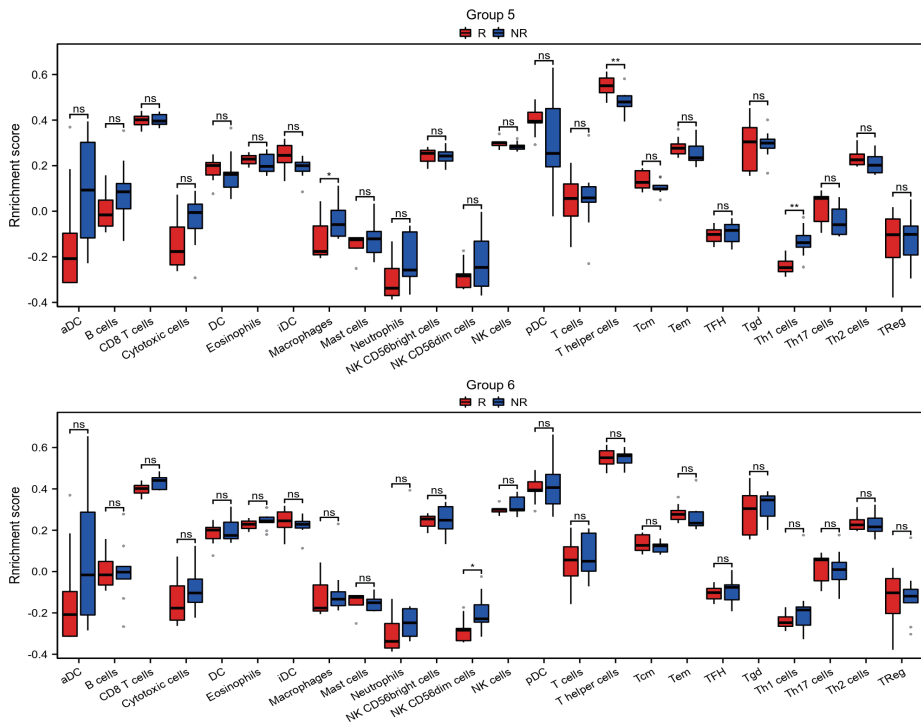

**Figure S2.** Comparison of immune cell content between response arm and nonresponse arm in six groups. \* $p < 0.05$ , \*\* $p < 0.01$ , \*\*\* $p < 0.001$ .
