# Supplementary material for: Intestinal mRNA expression profiles associated with mucosal healing in ustekinumab-treated Crohn's disease patients: bioinformatics analysis and prospective cohort validation
Source: Springer Nature journal article supplement (doi:10.1186/s12967-024-05427-w), 2024-06-26
Supplement: 12967_2024_5427_MOESM3_ESM.pdf [file 12967_2024_5427_MOESM3_ESM.pdf]

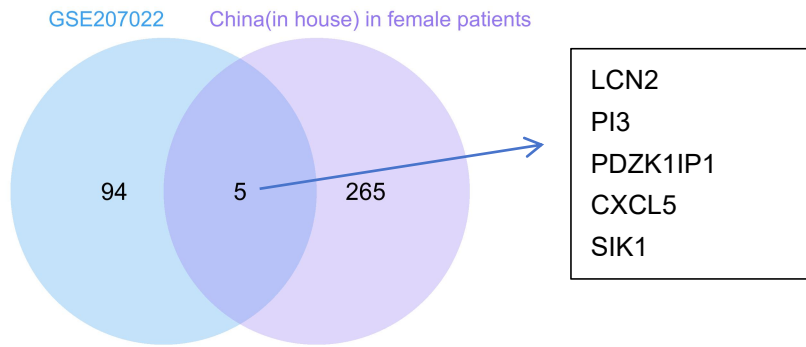

**Figure S3.** Venn diagrams of the differential genes between the discovery dataset and female samples (n = 6) of the validation dataset.
