# Supplementary material for: Intestinal mRNA expression profiles associated with mucosal healing in ustekinumab-treated Crohn's disease patients: bioinformatics analysis and prospective cohort validation
Source: Springer Nature journal article supplement (doi:10.1186/s12967-024-05427-w), 2024-06-26
Supplement: 12967_2024_5427_MOESM4_ESM.pdf [file 12967_2024_5427_MOESM4_ESM.pdf]

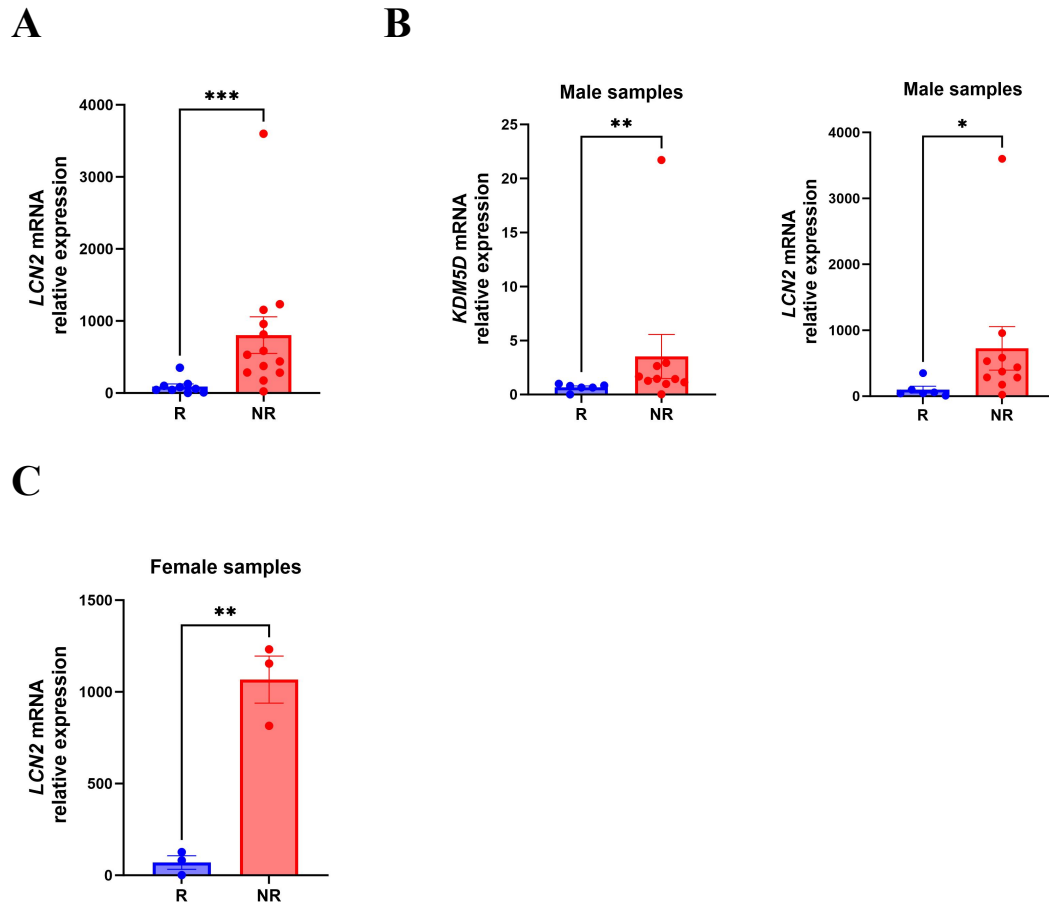

Figure S4. (A) Relative expression of LCN2 mRNA analysed using qRT-PCR in the validation dataset (R = 9; NR = 13). (B) Relative expression of KDM5D and LCN2 mRNA analysed using qRT-PCR in male samples of the validation dataset (R = 6; NR = 10). (C) Relative expression of LCN2 mRNA analyzed using qRT-PCR in female samples of the validation dataset (R = 3; NR = 3). \* $p < 0.05$ , \*\* $p < 0.01$ , \*\*\* $p < 0.001$ .
